# Supplementary material
Source: PubMed Central journal article supplement (PMC9355332)
Supplement: NIHMS1717724-supplement-Supplemental_Material.pdf [file NIHMS1717724-supplement-Supplemental_Material.pdf]

### Operational Replications in Study 1

This section presents a summary of the results from the three cohorts in Study 1. The results were consistent across each of the three cohorts and, thus, constitutes a three-cohort series of operational replications (Lykken, 1968, 1991).

Table S1a

*Correlations between Acceleration Indicators and Measures of Psychological Well-Being for Cohort 1*

| Measure                    | Age of High School Graduation | Acceleration Composite |
|----------------------------|-------------------------------|------------------------|
| Core Self-Evaluations      | .03                           | -.08                   |
| Positive Affect            | .03                           | -.05                   |
| Life Satisfaction          | .05                           | -.07                   |
| Negative Affect (Reversed) | .02                           | -.02                   |
| Psychological Flourishing  | .04                           | -.04                   |
| <b>Principal Component</b> | <b>.05</b>                    | <b>-.07</b>            |

Note. All correlations fall below Cohen's (1988) threshold for "small".

Table S1b

*Correlations between Acceleration Indicators and Measures of Psychological Well-Being for Cohort 2*

| Measure                    | Age of High School Graduation | Acceleration Composite |
|----------------------------|-------------------------------|------------------------|
| Core Self-Evaluations      | -.02                          | .06                    |
| Positive Affect            | -.03                          | .06                    |
| Life Satisfaction          | -.06                          | .10                    |
| Negative Affect (Reversed) | .00                           | .03                    |
| Psychological Flourishing  | -.07                          | .06                    |
| <b>Principal Component</b> | <b>-.04</b>                   | <b>.07</b>             |

Note. Despite the number of correlations computed, only one correlation met Cohen's (1988) threshold for "small" ( $\geq .1$  in magnitude); this correlation indicates that more acceleration is associated with better outcomes at age 50.

Table S1c

*Correlations between Acceleration Indicators and Measures of Psychological Well-Being for Cohort 3*

| Measure                    | Age of High School Graduation | Acceleration Composite |
|----------------------------|-------------------------------|------------------------|
| Core Self-Evaluations      | -.10                          | .05                    |
| Positive Affect            | -.09                          | .06                    |
| Life Satisfaction          | -.11                          | .09                    |
| Negative Affect (Reversed) | -.05                          | .05                    |
| Psychological Flourishing  | -.05                          | .06                    |
| <b>Principal Component</b> | <b>-.09</b>                   | <b>.08</b>             |

Note. Despite the number of correlations computed, only two correlations met Cohen's (1988) threshold for "small" ( $\geq .1$  in magnitude); both of these correlations indicate that more acceleration is associated with better outcomes at age 50.

Table S1d

*Summary of Latent Models for the Individual Cohorts with Acceleration Composite*

|                                         | Cohort 1 | Cohort 2 | Cohort 3 |
|-----------------------------------------|----------|----------|----------|
| RMSEA                                   | .06      | .07      | .08      |
| SRMR                                    | .03      | .03      | .06      |
| SES-Acceleration Composite Correlation  | .21      | .18      | .07      |
| SES → Psychological Well-Being          | .01      | .08      | .08      |
| Acc. Composite → Psychologic Well-Being | -.07     | .07      | .07      |

Note. Acc. = Acceleration. All path coefficients are from the completely standardized solution. Multi-group structural equation modeling also compared a full model (three separate sub-models with separate estimates fit for the three cohorts) to a constrained model (with loadings and structural paths constrained to be equal across the three cohorts). AIC preferred the full model over the constrained model (83,073 vs. 83,104) whereas BIC favored the constrained model over the full model (83,591 vs. 83,525). The change in chi-square between the constrained and full model was statistically significant ( $\Delta\chi^2(18) = 66.73, p < .001$ ) due to large sample size ( $n = 1,636$ ). Cohen's  $w$  for assessing the magnitude of the difference in favor of the full-model showed it to be trivial:  $w = .048$  where, using Cohen's conventional cutoffs, .1 is small, .3 is medium, and .5 is large. The equivocal model-comparison indices and the similar patterns of coefficients suggest that constrained model is as good as the full model.

Table S1e

*Summary of Latent Models for the Individual Cohorts with Age of High School Graduation*

|                                              | Cohort 1 | Cohort 2 | Cohort 3 |
|----------------------------------------------|----------|----------|----------|
| RMSEA                                        | .06      | .07      | .08      |
| SRMR                                         | .03      | .03      | .06      |
| SES-Age of Graduation Correlation            | -.08     | -.25     | .05      |
| SES → Psychological Well-Being               | .00      | .08      | .09      |
| Age of Graduation → Psychological Well-Being | .05      | -.03     | -.11     |

Note. All path coefficients are from the completely standardized solution. Using multi-group structural equation modeling, we compared a full model (three separate sub-models with separate estimates fit for the three cohorts) to a constrained model (with loadings and structural paths constrained to be equal across the three cohorts). AIC marginally preferred the full model over the constrained model (77,938 vs. 77,968) whereas BIC favored the constrained model over the full model (78,389 vs. 78,456). The change in chi-square between the constrained and full model was statistically significant ( $\Delta\chi^2(18) = 65.67, p < .001$ ) due to large sample size ( $n = 1,636$ ). Cohen's  $w$  for assessing the magnitude of the difference in favor of the full-model showed it to be trivial:  $w = .047$  where, using Cohen's conventional cutoffs, .1 is small, .3 is medium, and .5 is large. The equivocal model-comparison indices and the similar patterns of coefficients suggest that the cohorts can be justifiably combined for analysis.

**Description of Scales**

This section shows the descriptive statistics of each indicator of psychological well-being and the acceleration composite.

Table S2a

*Central Tendency and Variability Statistics of Indicators of Psychological Well-Being and the Indicators of Acceleration for Talent Search Participants*

|           | Core Self-Evaluations | Positive Affect | Life Satisfaction | Negative Affect (Reversed) | Psychological Flourishing | Acceleration Composite | Age of HS Graduation |
|-----------|-----------------------|-----------------|-------------------|----------------------------|---------------------------|------------------------|----------------------|
| Maximum   | 60                    | 25              | 35                | 70                         | 56                        | 33                     | 20.4                 |
| Median    | 45                    | 20              | 27                | 48                         | 47                        | 2                      | 17.8                 |
| Mean      | 45                    | 19.2            | 25.7              | 46.7                       | 46.5                      | 3.6                    | 17.7                 |
| Minimum   | 13                    | 5               | 5                 | 11                         | 8                         | 0                      | 11.9                 |
| <i>SD</i> | 7                     | 3.2             | 6.4               | 11                         | 6.2                       | 4.4                    | 0.7                  |

Note. *SD* = Standard deviation, HS = High School.

Table S2b

*Central Tendency and Variability Statistics of Indicators of Psychological Well-Being and the Acceleration Composite for Elite STEM Graduate Students*

|           | Core Self-Evaluations | Positive Affect | Life Satisfaction | Negative Affect (Reversed) | Psychological Flourishing | Acceleration Composite | Age of HS Graduation |
|-----------|-----------------------|-----------------|-------------------|----------------------------|---------------------------|------------------------|----------------------|
| Maximum   | 60                    | 25              | 35                | 68                         | 56                        | 16                     | 19.4                 |
| Median    | 45                    | 20              | 28                | 46                         | 47                        | 3                      | 17.9                 |
| Mean      | 44.6                  | 19.1            | 26.6              | 45.1                       | 46.2                      | 3.4                    | 17.9                 |
| Minimum   | 23                    | 8               | 6                 | 13                         | 21                        | 0                      | 15.1                 |
| <i>SD</i> | 6.8                   | 3.3             | 5.7               | 10.5                       | 5.3                       | 3                      | 0.5                  |

Note. *SD* = Standard deviation, HS = High School.

### Comparisons of Responders and Non-Responders

This section compares those who were included in this study (responders) and those who were not (non-responders), within cohort. Response patterns are compared with respect to ability, socioeconomic background, and gender. No meaningful differences were found between responders and non-responders.

Table S3a

#### *Ability and Background Comparisons of Responders and Non-Responders: Cohort 1*

| Outcome      | Group         |           |          |           |           |          | 95% CI for    |          |           |
|--------------|---------------|-----------|----------|-----------|-----------|----------|---------------|----------|-----------|
|              | Non-Responder |           |          | Responder |           |          | Mean          | <i>t</i> | <i>df</i> |
|              | <i>M</i>      | <i>SD</i> | <i>n</i> | <i>M</i>  | <i>SD</i> | <i>n</i> | Difference    |          |           |
| SAT-M        | 526.0         | 78.9      | 340      | 527.5     | 72.6      | 993      | -11.08, 8.02  | -0.32    | 548.3     |
| SAT-V        | 441.9         | 85.7      | 108      | 445.6     | 84.6      | 321      | -22.54, 14.97 | -0.40    | 182.1     |
| Dad Prestige | -0.03         | 1.00      | 165      | 0.01      | 1.00      | 627      | -0.21, 0.14   | -0.40    | 256.5     |
| Mom Prestige | -0.12         | 1.08      | 121      | 0.03      | 0.98      | 458      | -0.36, 0.06   | -1.38    | 176.0     |
| Dad Educ.    | 3.8           | 1.5       | 325      | 4.0       | 1.4       | 934      | -0.35, 0.23   | -1.71    | 553.1     |
| Mom Educ.    | 3.1           | 1.1       | 325      | 3.2       | 1.1       | 934      | -0.28, -0.01  | -2.07*   | 593.6     |

Note. \*  $p < .05$ . Educ = Education level. Prestige = occupational prestige, scaled in z-score units. Parents' educational level was coded as 1: less than high school, 2: high school, 3: some college or associate's, 4: college, 5: master's, 6: doctorate. There was an association between gender and response status (with females participating more):  $\chi^2(1) = 13.30, p < .001$ . Ns for SAT-V in Cohort 1 are relatively small because some of the waves in Cohort 1 were only selected on the SAT-M.

Table S3b

#### *Ability and Background Comparisons of Responders and Non-Responders: Cohort 2*

| Outcome      | Group         |           |          |           |           |          | 95% CI for   |          |           |
|--------------|---------------|-----------|----------|-----------|-----------|----------|--------------|----------|-----------|
|              | Non-Responder |           |          | Responder |           |          | Mean         | <i>t</i> | <i>df</i> |
|              | <i>M</i>      | <i>SD</i> | <i>n</i> | <i>M</i>  | <i>SD</i> | <i>n</i> | Difference   |          |           |
| SAT-M        | 559.7         | 66.4      | 182      | 550.5     | 66.8      | 394      | -2.51, 20.95 | 1.55     | 354.0     |
| SAT-V        | 468.8         | 79.9      | 182      | 457.2     | 70.8      | 394      | -0.93, 26.28 | 1.83     | 316.8     |
| Dad Prestige | 0.00          | 1.01      | 178      | 0.00      | 1.00      | 387      | -0.18, 0.18  | -0.05    | 338.7     |
| Mom Prestige | 0.00          | 0.89      | 80       | 0.00      | 1.05      | 180      | -0.25, 0.25  | 0.02     | 177.3     |
| Dad Educ.    | 4.4           | 1.0       | 181      | 4.4       | 1.0       | 389      | -0.22, 0.12  | -0.57    | 350.3     |
| Mom Educ.    | 3.8           | 1.0       | 183      | 3.8       | 1.1       | 389      | -0.19, 0.18  | -0.05    | 373.5     |

Note. Educ = Education level. Prestige = occupational prestige, scaled in z-score units. Parents' educational level was coded as 1: less than high school, 2: high school, 3: some college or associate's, 4: college, 5: master's, 6: doctorate. There was no association between gender and response status:  $\chi^2(1) = 0.30, p = .582$ .



Table S3c

*Ability and Background Comparisons of Responders and Non-Responders: Cohort 3*

| Outcome      | Group         |           |          |           |           |          | 95% CI for      |          |           |
|--------------|---------------|-----------|----------|-----------|-----------|----------|-----------------|----------|-----------|
|              | Non-Responder |           |          | Responder |           |          | Mean Difference | <i>t</i> | <i>df</i> |
|              | <i>M</i>      | <i>SD</i> | <i>n</i> | <i>M</i>  | <i>SD</i> | <i>n</i> |                 |          |           |
| SAT-M        | 695.0         | 77.0      | 176      | 683.4     | 88.6      | 180      | -5.68, 28.90    | 1.32     | 349.3     |
| SAT-V        | 542.6         | 104.5     | 175      | 554.3     | 103.6     | 180      | -33.37, 10.07   | -1.05    | 352.5     |
| Dad Prestige | -0.03         | 0.98      | 166      | 0.03      | 1.02      | 174      | -0.27, 0.16     | -0.54    | 338.0     |
| Mom Prestige | -0.07         | 1.10      | 172      | 0.07      | 0.89      | 174      | -0.35, 0.07     | -1.30    | 327.5     |
| Dad Educ.    | 5.5           | 1.5       | 176      | 5.7       | 1.4       | 180      | -0.55, 0.07     | -1.52    | 352.8     |
| Mom Educ.    | 4.1           | 1.1       | 176      | 4.3       | 1.0       | 180      | -0.34, 0.10     | -1.05    | 345.9     |

Note. Educ = Education level. Prestige = occupational prestige, scaled in z-score units. Parents' educational level was coded as 1: less than high school, 2: high school, 3: some college or associate's, 4: college, 5: master's, 6: doctorate. There was no association between gender and response status:  $\chi^2(1) = 3.31, p = .069$ .

Table S3d

*Ability and Background Comparisons of Responders and Non-Responders: Elite STEM Graduate*

*Students*

| Outcome      | Group         |           |          |           |           |          | 95% CI for      |          |           |
|--------------|---------------|-----------|----------|-----------|-----------|----------|-----------------|----------|-----------|
|              | Non-Responder |           |          | Responder |           |          | Mean Difference | <i>t</i> | <i>df</i> |
|              | <i>M</i>      | <i>SD</i> | <i>n</i> | <i>M</i>  | <i>SD</i> | <i>n</i> |                 |          |           |
| GRE-Q        | 728.5         | 67.5      | 165      | 747.7     | 52.5      | 416      | -30.7, -7.69    | -3.28**  | 246.6     |
| GRE-V        | 605.5         | 98.8      | 165      | 626.1     | 89.9      | 416      | -38.1, -3.17    | -2.32*   | 277.6     |
| Dad Prestige | -0.07         | 0.98      | 158      | 0.03      | 1.01      | 396      | -0.29, 0.07     | -1.12    | 298.0     |
| Mom Prestige | 0.09          | 0.93      | 139      | -0.04     | 1.03      | 322      | -0.06, 0.32     | 1.34     | 288.9     |
| Dad Educ.    | 4.6           | 1.7       | 191      | 4.6       | 1.6       | 469      | -0.30, 0.27     | -0.09    | 328.4     |
| Mom Educ.    | 4.0           | 1.7       | 198      | 4.0       | 1.8       | 468      | -0.28, 0.28     | 0.01     | 391.4     |
| Books Home   | 4.6           | 1.1       | 202      | 4.7       | 1.1       | 475      | -0.24, 0.13     | -0.61    | 358.6     |

Note. \*  $p < .05$ . \*\*  $p < .01$ . Educ = Education level. Prestige = occupational prestige, scaled in z-score units. Parents' educational level was coded as 1: less than high school, 2: high school, 3: some college or associate's, 4: college, 5: master's, 6: doctorate. Number of books in the home was coded as 1: none or very few (0-10), 2: a few (11-25), 3: one bookcase full (26- 100), 4: two bookcases full (101-250), 5: three or four bookcases full (251-500), 6: library (501+). There was no association between gender and response status:  $\chi^2(1) = 0, p = 1$ .

Table S3e

*Comparing the Ethnicities of Responders and Non-Responders in Study 1 (Cohorts 1, 2, & 3) and Study 2 (Elite STEM Graduate Students)*

| Cohort                              | White | Asian-American | Black or African-American | Hispanic | Other |
|-------------------------------------|-------|----------------|---------------------------|----------|-------|
| <b>Cohort 1</b>                     |       |                |                           |          |       |
| Responders                          | 94.8% | 1.8%           | 0.9%                      | 0.5%     | 1.9%  |
| Non-Responder                       | 97.7% | 2.3%           | 0.0%                      | 0.0%     | 0.0%  |
| <b>Cohort 2</b>                     |       |                |                           |          |       |
| Responders                          | 89.6% | 6.8%           | 0.5%                      | 0.8%     | 2.3%  |
| Non-Responder                       | 89.1% | 7.6%           | 2.2%                      | 1.1%     | 0.0%  |
| <b>Cohort 3</b>                     |       |                |                           |          |       |
| Responders                          | 75.5% | 18.6%          | 0.9%                      | 0.5%     | 4.5%  |
| Non-Responder                       | 79.0% | 19.3%          | 0.6%                      | 0.0%     | 1.1%  |
| <b>Elite STEM Graduate Students</b> |       |                |                           |          |       |
| Responders                          | 84.0% | 9.0%           | 1.0%                      | 2.0%     | 4.0%  |
| Non-Responder                       | 76.9% | 11.1%          | 4.5%                      | 3.5%     | 4.0%  |

Table S4

*Percentages of Talent Search Cohorts Identified by Meeting the Selection Criteria on SAT-M,*

*SAT-V, and Both*

|          | SAT-M | SAT-V | Both SAT-M & SAT-V |
|----------|-------|-------|--------------------|
| Cohort 1 | 73.2% | 0.4%  | 26.4%              |
| Cohort 2 | 25.2% | 12.1% | 62.7%              |
| Cohort 3 | 68.9% | 20.5% | 10.5%              |

Note. Selection criteria for each cohort were as follows: Cohort 1 = SAT-M  $\geq$  390 or SAT-V  $\geq$  370, Cohort 2 = SAT-M  $\geq$  500 or SAT-V  $\geq$  430, and Cohort 3 = SAT-M  $\geq$  700 or SAT-V  $\geq$  630.
